# Supplementary material for: Interpretable protein-DNA interactions captured by structure-sequence optimization
Source: eLife. 2025 Jul 17;14:RP105565. doi: 10.7554/eLife.105565 (PMC12270484; doi:10.7554/eLife.105565)
Supplement: Figure 2—figure supplement 6—source data 1. [file elife-105565-fig2-figsupp6-data1.xlsx]

## Sheet: Sheet1
Figure 2-figure supplement 6-source data 1
Raw AUC scores for distinguishing strong and weak binders across 22 proteins from 12 protein families using six different prediction methods: IDEA, IDEA augmented with binding sequences (IDEA-seq), ProBound, DeepBind, DBD-Hunter, and rCLAMPS.
ID	IDEA	IDEA-seq	ProBound	DeepBind	DBD-Hunter	rCLAMPS
ELK1	0.81	0.745	0.998	1	0.626
FOXP3	0.873	1	0.342	0.812	0.162
MAX	0.941	1	0.736	0.995	0.49
TCF4	0.638	1	0.827	0.842	0.09
USF1	0.484	1	1	0.978	0.623
Cebpb	0.983	1	0.934	1	0.509
CEBPB	0.923	1	0.362	1	0.357
Mafb	0.607	0.987	0.944	0.998	0.794
Egr1	0.181	0.857	0.106	0.983	0.319	0.214
YY1	1	1	0.5	1	0.778	0.667
ZBTB7A	0.998	1	0.89	0.764	0.548
GATA3	0.816	0.933	0.87	0.896	0.488
ALX4	0.631	1	0.998	1	0.1	0.168
BARHL2	0.822	0.999	0.934	0.987	0.723	0.533
MSX1	0.926	0.998	0.732	0.829	0.382	0.113
PDX1	0.595	0.832	0.719	0.997	0.539	0.645
HSF1	0.993	1	1	1	0.742
SMAD3	0.992	0.999	1	1	0.402
MEIS1	0.797	1	0.256	1	0.245
NR2C2	1	1	0.203	1	0.054
NR3C1	0.921	0.999	0.539	1	0.724
POU3F1	0.324	0.989		0.956	0.077
