# Supplementary material for: Interpretable protein-DNA interactions captured by structure-sequence optimization
Source: eLife. 2025 Jul 17;14:RP105565. doi: 10.7554/eLife.105565 (PMC12270484; doi:10.7554/eLife.105565)
Supplement: Figure 2—figure supplement 6—source data 2. [file elife-105565-fig2-figsupp6-data2.xlsx]

## Sheet: Sheet1
Figure 2-figure supplement 6-source data 2
Raw PRAUC scores for distinguishing strong and weak binders across 22 proteins from 12 protein families using six different prediction methods: IDEA, IDEA augmented with binding sequences (IDEA-seq), ProBound, DeepBind, DBD-Hunter, and rCLAMPS.
ID	IDEA	IDEA-seq	ProBound	DeepBind	DBD-Hunter	rCLAMPS
ELK1	0.651	0.604	0.997	1	0.509
FOXP3	0.738	1	0.524	0.795	0.335
MAX	0.772	1	0.556	0.994	0.449
TCF4	0.617	1	0.796	0.807	0.317
USF1	0.474	1	1	0.977	0.532
Cebpb	0.976	1	0.868	1	0.452
CEBPB	0.691	1	0.395	1	0.377
Mafb	0.539	0.985	0.844	0.998	0.694
Egr1	0.275	0.746	0.318	0.98	0.373	0.345
YY1	1	1	0.435	1	0.592	0.512
ZBTB7A	0.83	1	0.709	0.573	0.449
GATA3	0.636	0.925	0.895	0.899	0.436
ALX4	0.542	1	0.911	1	0.322	0.334
BARHL2	0.737	0.934	0.434	0.986	0.598	0.466
MSX1	0.815	0.998	0.584	0.878	0.401	0.326
PDX1	0.488	0.765	0.54	0.996	0.455	0.508
HSF1	0.992	1	1	1	0.58
SMAD3	0.903	0.915	1	1	0.4
MEIS1	0.631	1	0.369	1	0.352
NR2C2	1	1	0.339	1	0.31
NR3C1	0.791	0.999	0.513	1	0.586
POU3F1	0.338	0.945		0.96	0.282
